# Supplementary material for: Palladium nanoparticles encapsulated in porous silica shells: an efficient and highly stable catalyst for CO oxidation
Source: Royal Society of Chemistry journal article supplement (doi:10.1039/c2ra22832g), 2012-11-13
Supplement: c2ra22832g.pdf [file c2ra22832g.pdf]

# **Palladium nanoparticles encapsulated in porous silica shells: an efficient and highly stable catalyst for CO oxidation**

Ye Xu, Jinqiang Ma, Yuanfeng Xu, Lei Xu, Liang Xu, Hexing Li and Hui Li\*

The Education Ministry Key Lab of Resource Chemistry and Shanghai Key Laboratory of Rare Earth Functional

Materials, Shanghai Normal University, Shanghai 200234, P. R. China

## **Supplementary information**

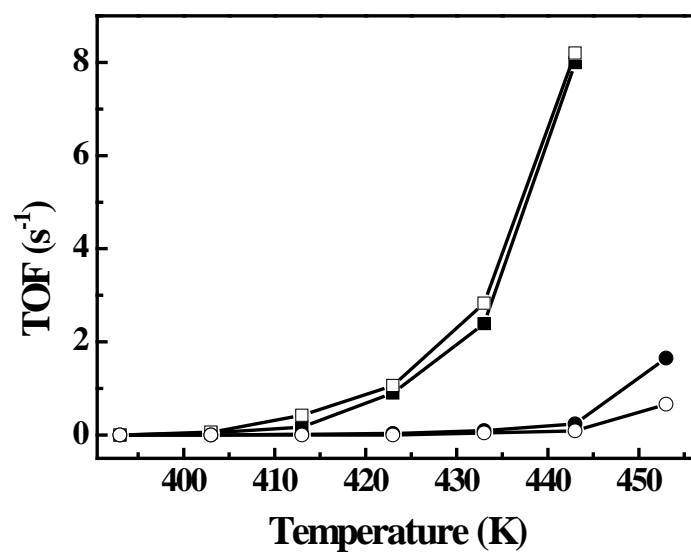

**Fig. S1.** TOF values of CO oxidation over different catalysts. (■) Pd@SiO<sub>2</sub>-673, (□) Pd@SiO<sub>2</sub>-873, (●) Pd/SiO<sub>2</sub>-673, and (○) Pd/SiO<sub>2</sub>-873. Reaction conditions: 1.0 vol.% CO and 20.0 vol.% O<sub>2</sub> balanced with N<sub>2</sub>, atmospheric pressure.

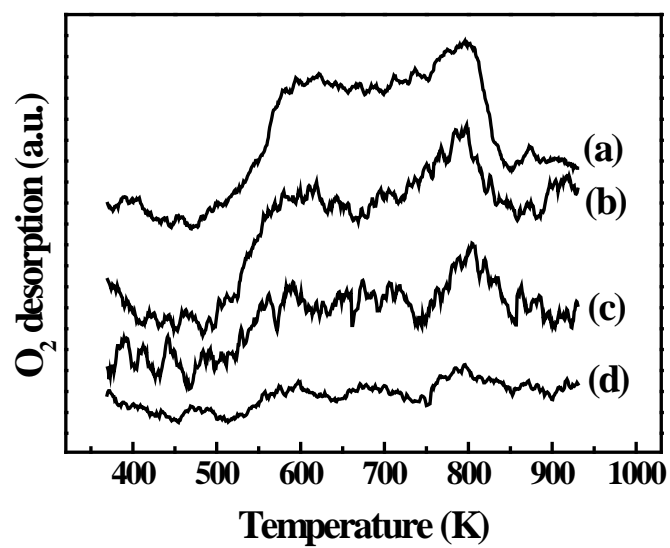

**Fig. S2.** O<sub>2</sub>-TPD profiles of (a) Pd@SiO<sub>2</sub>-673, (b) Pd@SiO<sub>2</sub>-873, (c) Pd/SiO<sub>2</sub>-673, and (d) Pd/SiO<sub>2</sub>-873. The signal is normalized based on unit mass Pd

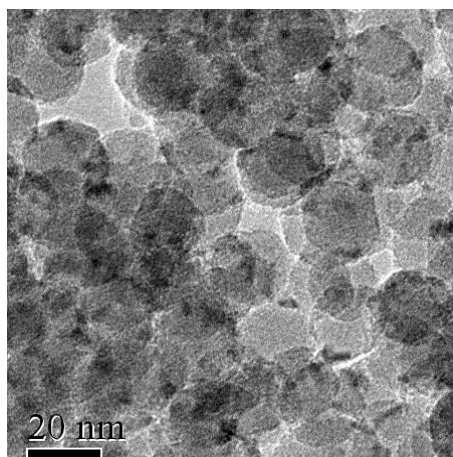

**Fig. S3.** TEM image of Pd@SiO<sub>2</sub>-673-CeO<sub>2</sub>. The sample was prepared by the following method. 1.0 g of Pd@SiO<sub>2</sub>-673 was impregnated with Ce(NO<sub>3</sub>)<sub>3</sub>·6H<sub>2</sub>O aqueous solution (0.2 mol/L). After being ultrasonication for 5 min, the impregnation was allowed to proceed for 12 h. After being dried at 373 K, the sample was calcinated at 673 K for 4 h, and then reduced in a 10% H<sub>2</sub>/N<sub>2</sub> flow at 373 K for 4 h.

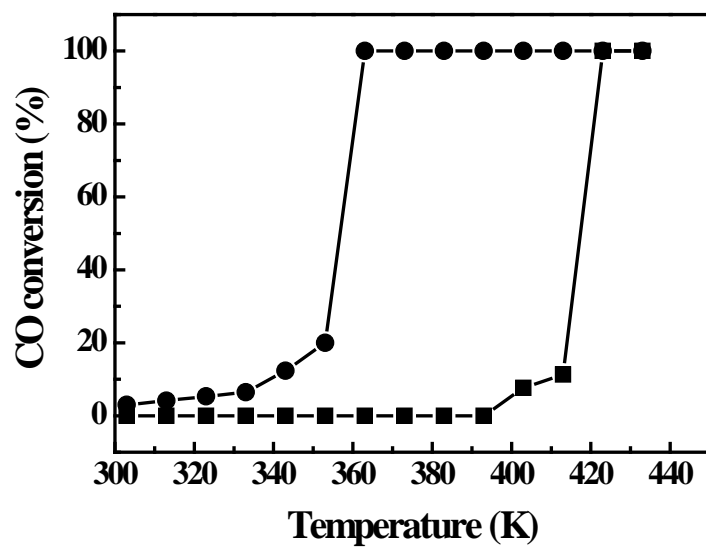

**Fig. S4.** Effect of the reaction temperature on CO conversions over Pd@SiO<sub>2</sub>-673 (■) and Pd@SiO<sub>2</sub>-673-CeO<sub>2</sub> (●). Reaction conditions: 1.0 vol.% CO and 20.0 vol.% O<sub>2</sub> balanced with N<sub>2</sub>, atmospheric pressure, GHSV = 6000 L g<sub>pd</sub><sup>-1</sup> h<sup>-1</sup>.

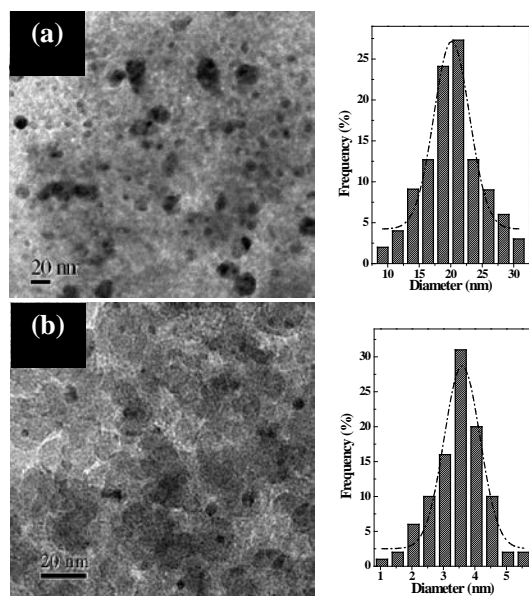

**Fig. S5.** TEM images (*left*) and the corresponding Pd size distribution histograms (*right*) of the used (a) Pd/SiO<sub>2</sub>-673 and (b) Pd@SiO<sub>2</sub>-673.
